# Supplementary material
Source: PubMed Central journal article supplement (PMC1140621)
Supplement: molcellb_25_11_4501__3.pdf [file molcellb_25_11_4501__3.pdf]

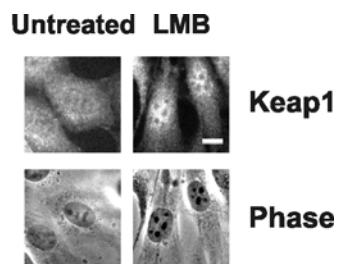

**Supplementary Figure 3. LMB effect on endogenous Keap1**

Shorter exposure to LMB results in a nuclear accumulation of endogenous Keap1. NIH3T3 cells were cultured as described for Figure 2, and treated with 3 nM LMB for 3 hours. Cells were PFA fixed and immunostained for endogenous Keap1 as described for Figure 2. Scale bar = 10 $\mu$ m.
